# Supplementary material for: LiKidMiRs: A ddPCR-Based Panel of 4 Circulating miRNAs for Detection of Renal Cell Carcinoma
Source: MDPI journal article supplement (doi:10.3390/cancers14040858), 2022-02-09
Supplement: s1 [file s1]

**Table S1** – Performance of miRNAs as biomarkers for detection of Renal Cell Tumors.

| miRNAs                                                | SE %  | SP %  | PPV % | NPV % | Accuracy % |
|-------------------------------------------------------|-------|-------|-------|-------|------------|
| hsa-miR-21-5p                                         | 61.15 | 64.06 | 78.70 | 43.16 | 62.07      |
| hsa-miR-155-5p                                        | 37.41 | 92.19 | 91.23 | 40.41 | 54.68      |
| hsa-miR-21-5p/ hsa-miR-155-5p                         | 87.05 | 56.25 | 81.21 | 66.67 | 77.34      |
| Multiple ROC Curve<br>(hsa-miR-21-5p/ hsa-miR-155-5p) | 82.50 | 49.29 | 58.24 | 78.16 | 71.85      |

Abbreviations: SE-Sensitivity; SP-Specificity PPV – Positive Predictive Value; NPV – Negative Predictive Value

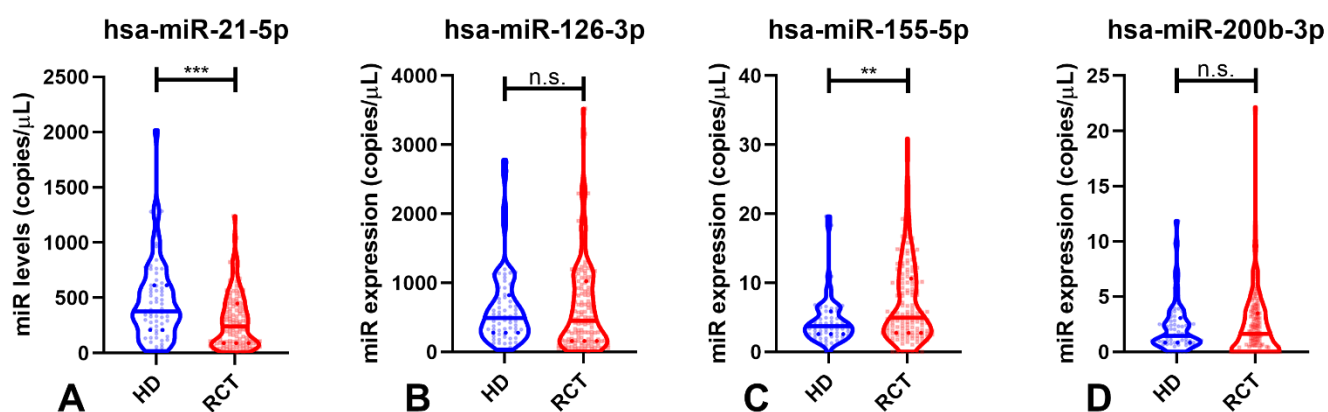

**Figure S1** – Violin plots with all points of miRNAs levels in Healthy Donors (HD) and Renal Cell Tumors (RCT) samples of hsa-miR-21-5p (A), hsa-miR-126-3p (B), hsa-miR-155-5p (C) and hsa-miR-200b-3p (D). Dashed lines indicate the interquartile range and horizontal line the median of miR levels. Abbreviations: HD – Healthy Donors; RCT – Renal Cell Tumors; n.s. – not significant, \*\* –  $p$ -value < 0.001, \*\*\* –  $p$ -value < 0.0001.

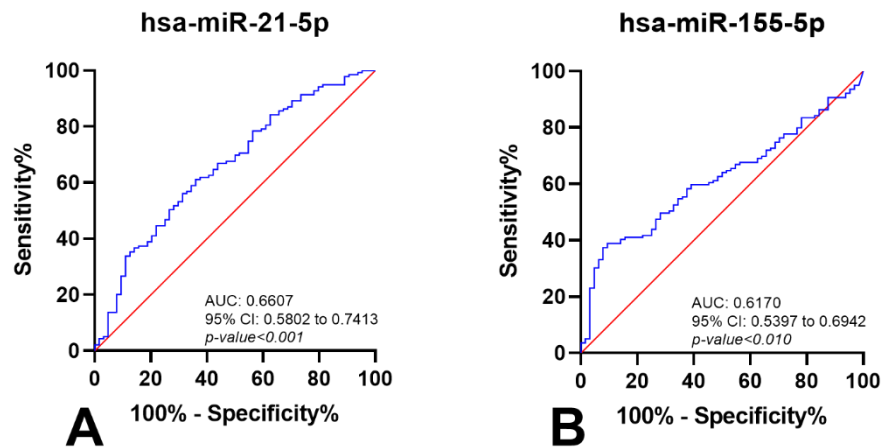

**Figure S2** – Receiver Operating Characteristic Curve (without resampling analysis) of hsa-miR-21-5p (A) and hsa-miR-155-5p (B). Red line indicates the reference line and blue line the identity line for each miRNA. Abbreviations: AUC – Area Under the Curve; CI – Confidence Interval.
